# Supplementary material for: Weakening of Antarctic Stratospheric Planetary Wave Activities in Early Austral Spring Since the Early 2000s: A Response to Sea Surface Temperature Trends
Source: Copernicus journal article supplement (doi:10.5194/acp-2021-395), 2021-06-01
Supplement: Supplementary file 1 [file acp-2021-395-supplement.pdf]

Supporting Information for

**Weakening of the Antarctic Stratospheric Planetary Wave  
Activities in Austral Early Spring Since Early 2000s Due to Sea  
Surface Temperature Trends**

YIHANG HU, WENSHOU TIAN, JIAKAI ZHANG, TAO WANG, MIAN XU

*Key Laboratory for Semi-Arid Climate Change of the Ministry of Education, College of Atmospheric*

*Sciences, Lanzhou University, China*

\*Correspondence to: [wstian@lzu.edu.cn](mailto:wstian@lzu.edu.cn)

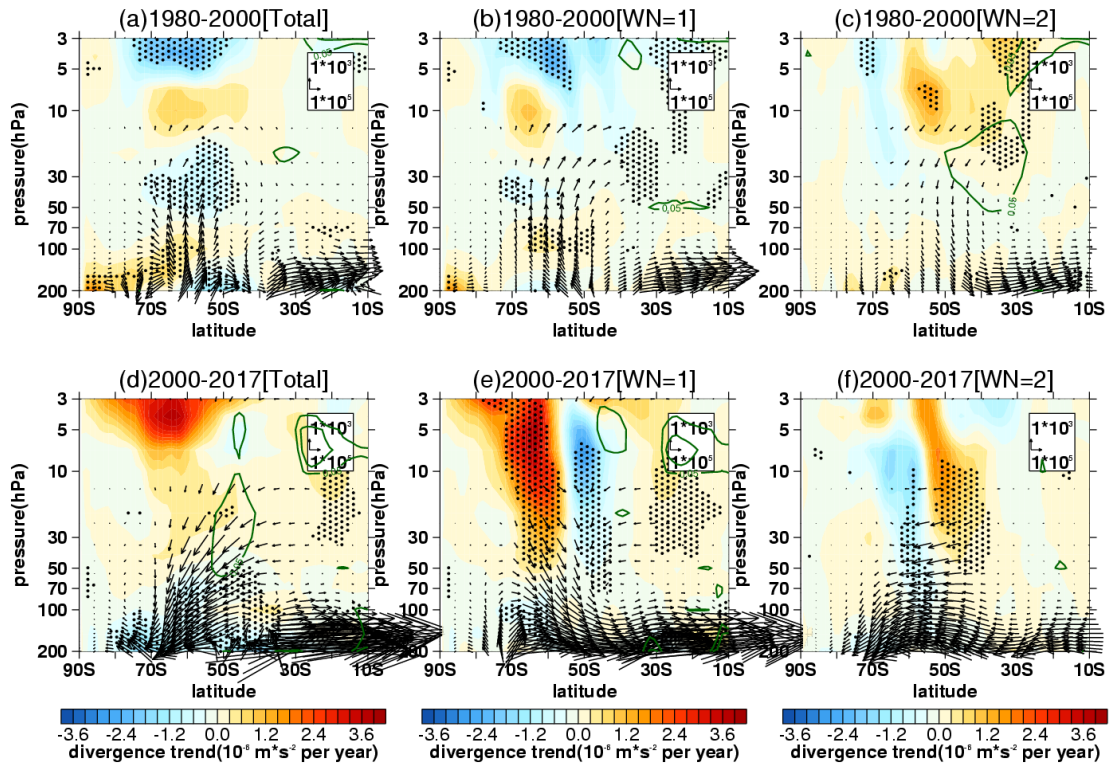

1

2 **FIG. S1.** Same as Fig. 1, except for the August.

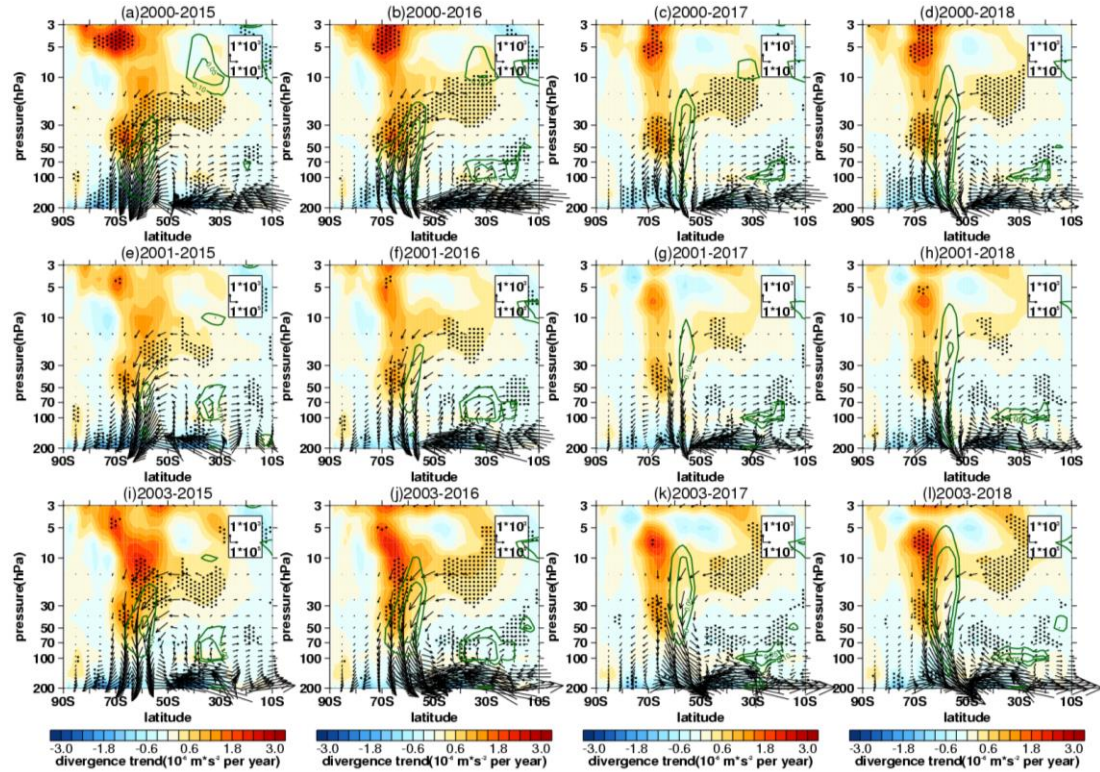

3

4 **FIG. S2.** Trends of Southern Hemispheric undecomposed stratospheric E-P flux

5 (arrows, units in horizontal and vertical components are  $10^5$  and  $10^3$   $\text{kg}\cdot\text{s}^{-2}$  per year,

6 respectively) and its divergence (shadings) in September over different periods (titles)  
 7 derived from MERRA-2 dataset. Data in 2002 are removed when calculating trends  
 8 with beginning year before it. The stippled regions and green contours are the same as  
 9 Figure 1.

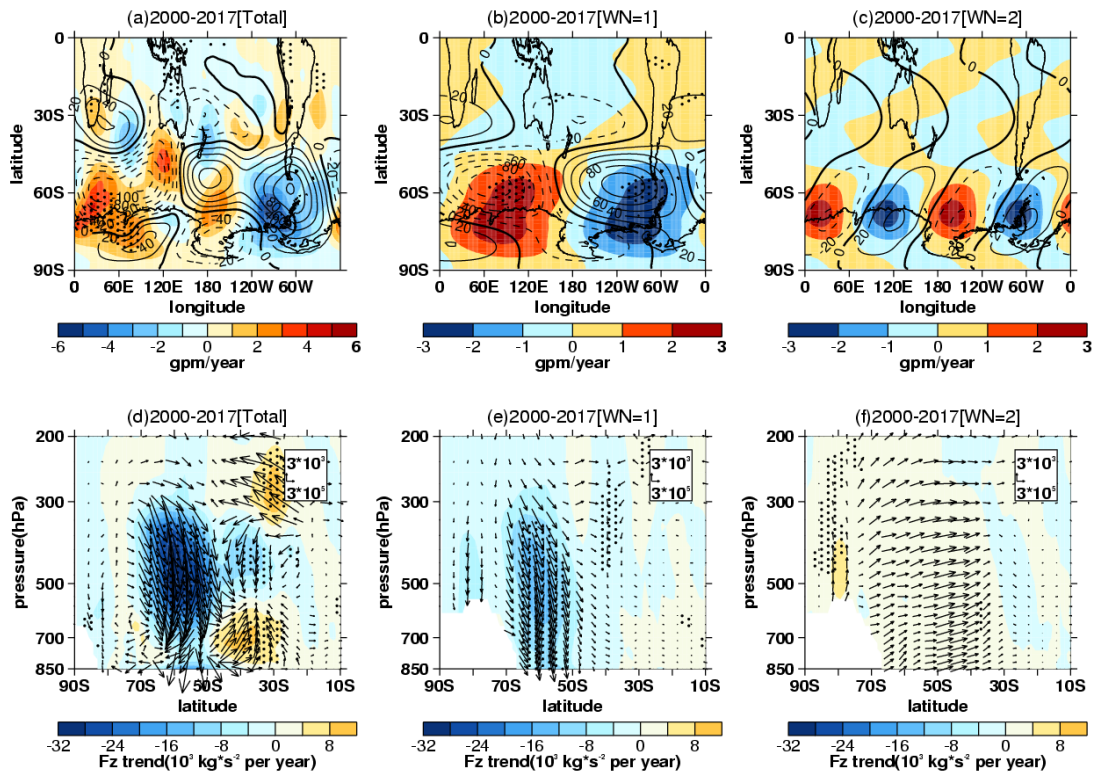

10

11 **FIG. S3.** Same as Fig. 3, except that the values in 2002 are removed.

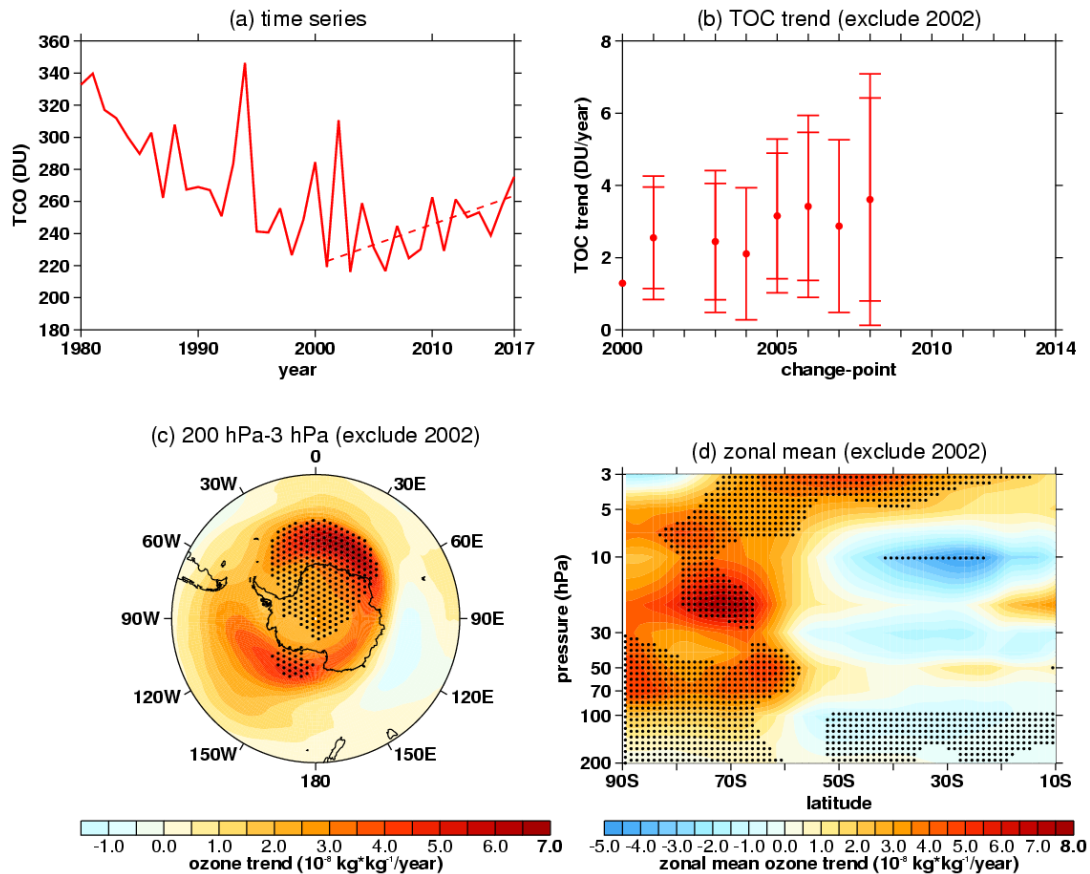

12

13 **FIG. S4.** (a) Time series (red solid line) of area-weighted total column ozone (TCO)  
 14 over 60°S to 90°S. The red dash line represents linear regression of TCO during 2001-  
 15 2017. (b) The trends (dots) and uncertainties (error bars) of September TCO time series  
 16 from several beginning years after 2000 to 2017. The long and short error bars reflect  
 17 the 95% and 90% confidence intervals calculated by two-tailed t test. The error bar is  
 18 omitted when significance of trend is lower than corresponding confidence level. (c)  
 19 The ozone trend on horizontal plane averaged from 200 hPa to 3 hPa from 2001 to 2017.  
 20 (d) The zonal mean ozone trend on latitude-pressure profile in Southern Hemisphere  
 21 from 2001 to 2017. The stippled regions in Fig. S4c and Fig. S4d represent the trends  
 22 significant at/above the 90% confidence level. Data in 2002 are removed when trends,  
 23 regression, significances or confidence intervals are calculated in Fig. S4. All data

24 involved in Fig. S4 are derived from MERRA-2 dataset.

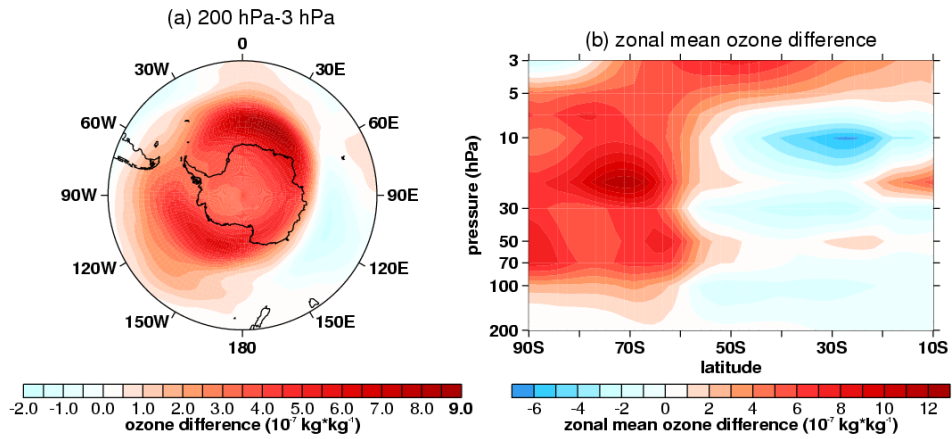

25

26 **FIG. S5.** (a) Difference of ozone forcing fields on horizontal plane averaged from 200  
27 hPa to 3 hPa between O3sen and O3ctrl. The outermost latitude in Fig. S5a is 40°S. (b)  
28 Zonal mean difference of ozone forcing fields on latitude-pressure profile in Southern  
29 Hemisphere between O3sen and O3ctrl.

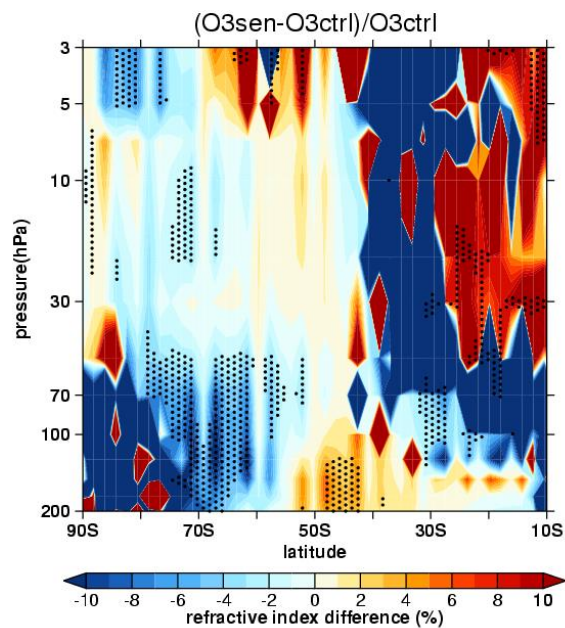

30

31 **Fig. S6.** Difference of refractive index between O3sen and O3ctrl. The stippled region  
32 represent the difference significant at/above the 90% confidence level. Although there  
33 is significant reduction of refractive index over 50°S-70°S, 200 hPa-70 hPa, the mean  
34 reduction induced by ozone recovery in this region is about only 3%.
